# Supplementary material for: Glioblastoma disrupts the ependymal wall and extracellular matrix structures of the subventricular zone
Source: PubMed Central journal article supplement (PMC9277938; doi:10.1186/s12987-022-00354-8), 2022-07-11

GFP  
DAPI

LV-Proximal  
GBM

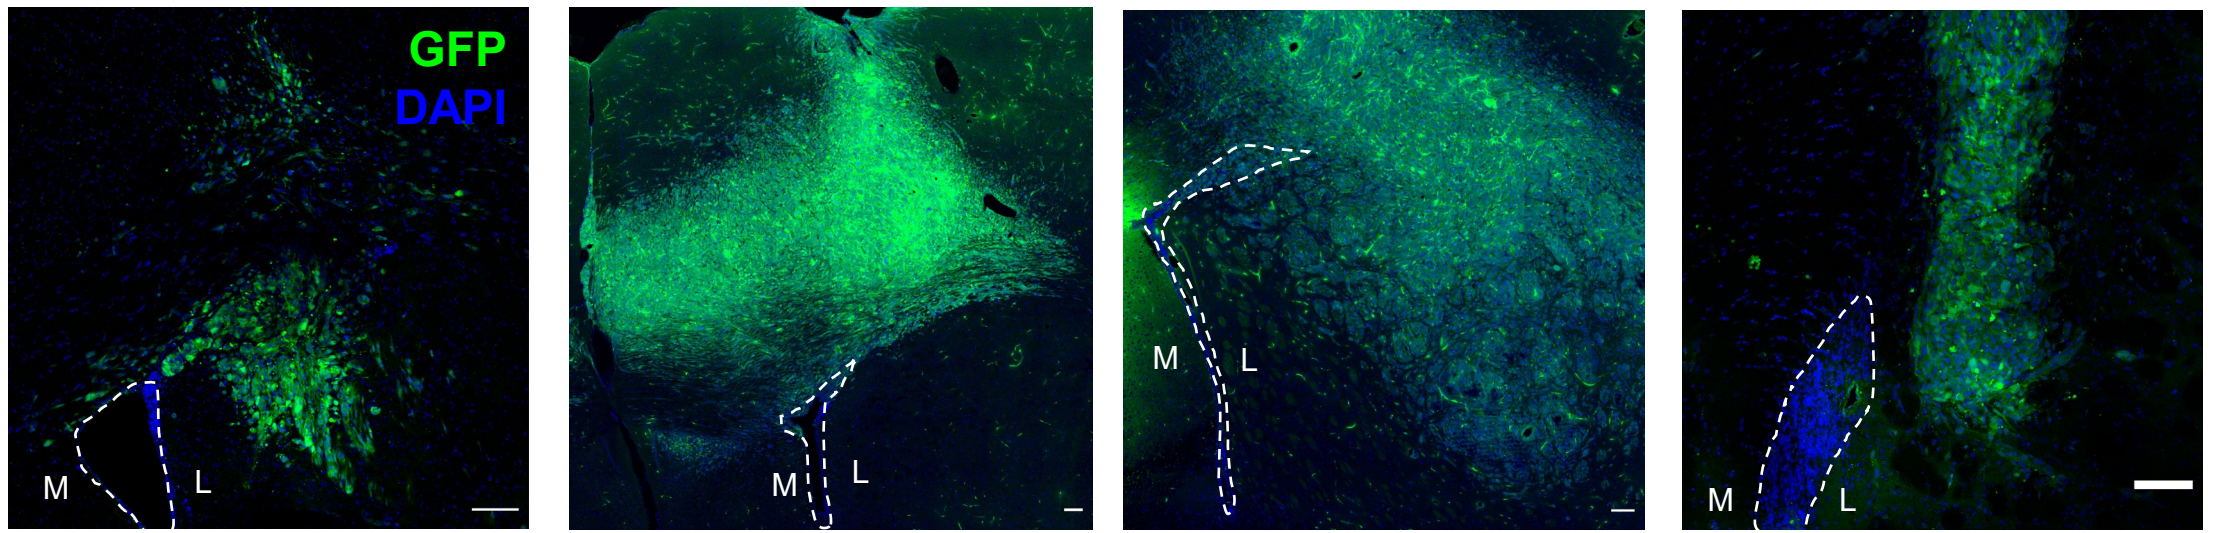

LV-Distal  
GBM

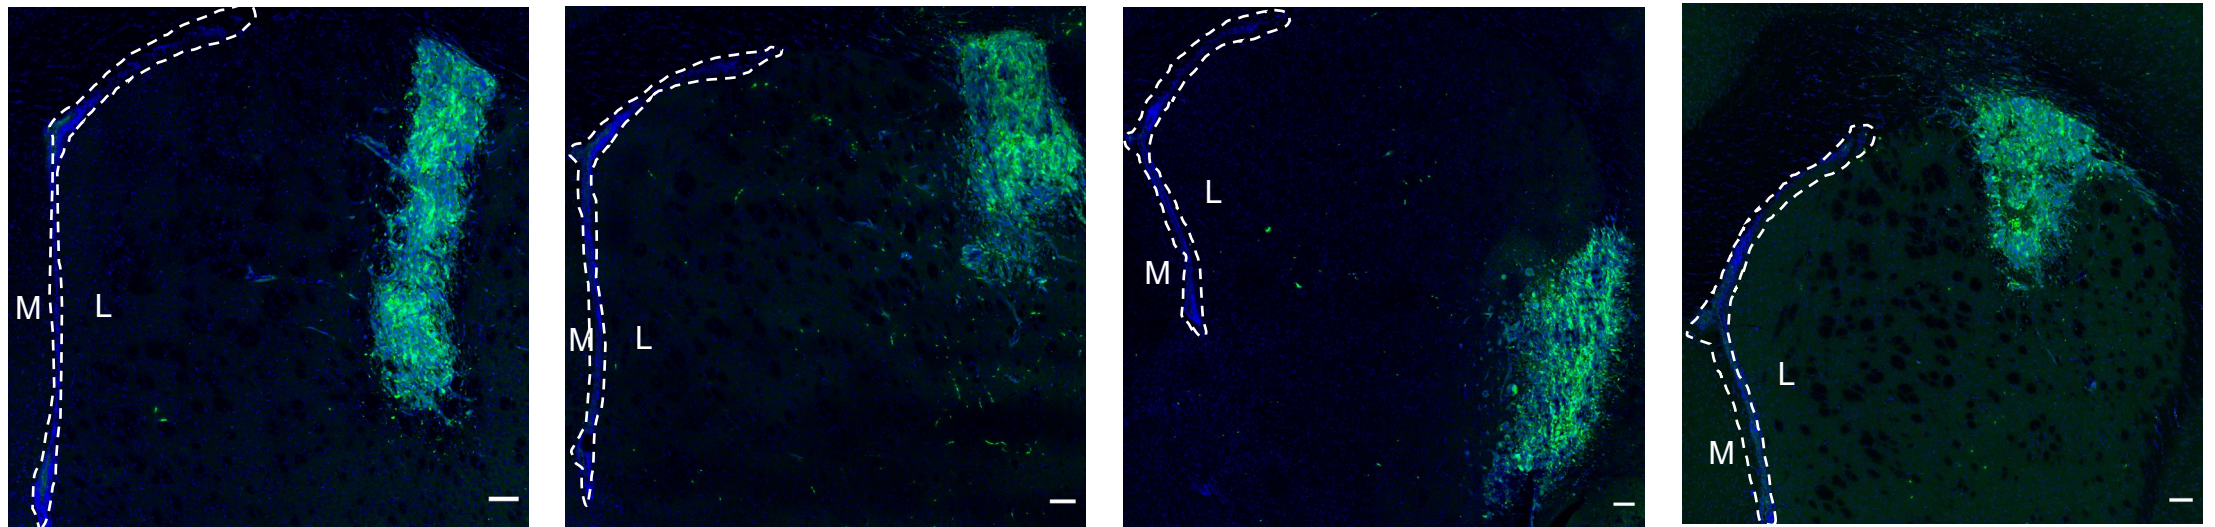

Supplement: 12987_2022_354_MOESM1_ESM.pdf [file 12987_2022_354_MOESM1_ESM.pdf]
